# Supplementary material
Source: PubMed Central journal article supplement (PMC3785276)

## **Supplementary (web extra) material**

### **Pharmacokinetic studies**

A 4-point abbreviated pharmacokinetic profile for CsA was measured 4 weeks after start of CsA therapy by CEDIA-Cyclosporine Plus Combi Kit, Thermo Fisher Microgenics Corporation, and the CsA-AUC was calculated as described.<sup>1</sup>

A 3-point abbreviated pharmacokinetic profile for MPA was performed during MMF-therapy after three and six months based on MPA plasma concentrations before oral intake of MMF ( $C_0$ ) and 30 min ( $C_{0.5}$ ) and 2 hours ( $C_2$ ) thereafter<sup>2</sup>. The area under the time-concentration curve (AUC) was calculated as follows:  $MPA -AUC = 7.75+(6.49*C_0)+(0.76*C_{0.5})+(2.43*C_2)^2$ . All pharmacokinetic profiles were analyzed in a central laboratory (Department of Clinical Pharmacology, Charité Berlin). MPA was measured by CEDIA-MPA Immunoassay, Thermo Fisher Microgenics Corporation. To determine whether the MPA-AUC could reliably discriminate patients with a recurrence of the nephrotic syndrome from those with no recurrence, receiver operating characteristic (ROC) plots of sensitivity versus 1-specificity were generated using Analyse-It version 1.44 (Analyse-It Software, UK).

### **Relapse therapy**

The standard therapy for relapses of the nephrotic syndrome consisted of prednisone 60 mg/m<sup>2</sup> BSA per day (maximum 80 mg/day); after three days of absent proteinuria, the prednisone dosage was reduced to 40 mg/m<sup>2</sup> every other day for four weeks, without a change in the concomitant medication with MMF or CsA, respectively.<sup>3</sup>

### **References**

1. Filler G, Feber J, Lepage N, Weiler G, Mai I. Universal approach to pharmacokinetic monitoring of immunosuppressive agents in children. *Pediatr Transplant* 2002;6:411-8.
2. Pawinski T, Kunicki PK, Sobieszczanska-Malek M, Gralak B, Szlaska I. A limited sampling strategy for estimating mycophenolic acid area under the curve in adult heart transplant patients treated with concomitant cyclosporine. *J Clin Pharm Ther* 2009;34:89-101.

3. Cyclophosphamide treatment of steroid dependent nephrotic syndrome: comparison of eight week with 12 week course. Report of Arbeitsgemeinschaft fur Padiatrische Nephrologie. Arch Dis Child 1987;62:1102-6.

**Suppl. Table 1**

| <b>Previous Treatment of FR-SSNS</b> |                     |
|--------------------------------------|---------------------|
| <b>Medication</b>                    | <b>Patients (n)</b> |
| No Treatment                         | 15                  |
| Levamisol                            | 1                   |
| Levamisol/ MMF                       | 1                   |
| Cyclophosphamide (CP)                | 13                  |
| CP / Chlorambucil                    | 1                   |
| CP/ Levamisol                        | 3                   |
| CP/ CsA                              | 14                  |
| CP/ Chlorambucil/ CsA                | 1                   |
| CP/ Levamisol/ CsA                   | 1                   |
| CsA                                  | 6                   |
| CsA/ MMF                             | 2                   |

Immunosuppressive therapy before start of the study. The sequence of medication is listed in chronological order.

**Suppl. Table 2**

| <b>Patient</b> | <b>MMF-Therapy<br/>(n=4)</b> | <b>CsA-Therapy<br/>(n=6)</b> | <b>Number of<br/>Relapses</b> |
|----------------|------------------------------|------------------------------|-------------------------------|
| 1              |                              | Enalapril                    | 0                             |
| 2              |                              | Enalapril                    | 0                             |
| 3              |                              | Nifedipine                   | 3 (2 CsA/1 MMF)               |
| 4              | Nifedipine<br>Enalapril      | Nifedipine<br>Enalapril      | 0                             |
| 5              | Enalapril                    | Enalapril                    | 1 (MMF)                       |
| 6              | Ramipril                     |                              | 1 (MMF)                       |
| 7              | Enalapril                    |                              | 2 (2 MMF)                     |
| 8              |                              | Enalapril                    | 0                             |

Antihypertensive medication and number of relapses in each treatment arm

**Suppl. Table 3**

|                       | <b>MMF-Therapy</b> |           | <b>CsA-Therapy</b> |           |
|-----------------------|--------------------|-----------|--------------------|-----------|
| Parameter             | mean               | Range     | mean               | range     |
| Hemoglobin (g/dl)     | 13.3               | 11.3-15.3 | 12.4               | 9.9-15.3  |
| PCV [l/l]             | 0.39               | 0.35-0.5  | 0.36               | 0.29-0.45 |
| WBC [n/μl]            | 7.16               | 3.2 -13.1 | 6.58               | 3.2-11.9  |
| Sodium [mmol/l]       | 139                | 131-143   | 139                | 133-143   |
| Potassium [mmol/l]    | 4.10               | 3.5-4.7   | 4.58               | 3.8-5.4   |
| Magnesium [mmol/l]    | 0.85               | 0.68-1.04 | 0.82               | 0.64-1.66 |
| ASAT [U/l]            | 19.8               | 7.8-192   | 16.8               | 5-55      |
| ALAT [U/l]            | 24.3               | 10-66     | 26.0               | 9-42      |
| Cholesterol [mg/dl]   | 173                | 104-315   | 181                | 120-257   |
| Triglycerides [mg/dl] | 87.8               | 21-427    | 95.9               | 20-344    |
| LDL-C [mg/dl]         | 108                | 64-232    | 101                | 18-164    |
| HDL-C [mg/dl]         | 58                 | 29-160    | 63                 | 37-152    |

Laboratory values determined at the end of each treatment period

|                       |
|-----------------------|
| <b>Suppl. Table 4</b> |
|-----------------------|

**Miscellaneous Adverse Effects (Table 3)**

|                                   | MMF-Therapy | CsA Therapy |
|-----------------------------------|-------------|-------------|
| Fractured bone                    | 2           |             |
| Insect bite                       | 1           |             |
| Bruising trauma                   | 1           |             |
| Painful Hydrocele                 | 1           |             |
| Amputation of Finger after injury |             | 1           |
| Tic bite                          |             | 1           |
| Greenstick fracture               |             | 1           |
| Total                             | 5           | 3           |

## Legends to supplementary figures

**Suppl. Fig. 1:** Study Synopsis

**Suppl. Fig. 2:** MPA-AUC measured in 26 patients with an unchanged MMF dose at 3 and 6 months.

**Suppl. Figure 3:** Efficacy of CsA and MMF (in patients with high MPA exposure) in preventing relapses in FR-SSNS patients

Kaplan-Meier survival-analysis: Time without relapse (cumulative sustained remission) during treatment with CsA or MMF (in 21 patients with an MPA-AUC >50 µg\*h/ml).

**Suppl. Fig. 3A,** in the first treatment year (p=0.32, long-rank test).

**Suppl. Fig. 3B,** in the second treatment year (p=0.62, long-rank test).

**Suppl. Fig. 4:** ROC curves computed for 3-month MPA-C-0 values (n=43). Diagnostic sensitivities (true positives) were calculated for each individual AUC-C-0 value as the fraction of patients with a recurrence to have lower values. The corresponding diagnostic specificities (false negatives) were calculated as the fraction of patients with no recurrence to have higher values. MPA-C-0 concentrations had no significant predictive value for relapses (MPA-C0-AUC=0.50; p=0.45)

**Suppl. Fig. 5:** Renal Function (eGFR) measured at 0.12, and 24 months.

When compared at time points 12 and 24 months, renal function (eGFR) decreased during CsA therapy in the second year in group A (p=0.004) and increased with MMF therapy during the second year in group B (0.006).

Suppl. Fig. 1

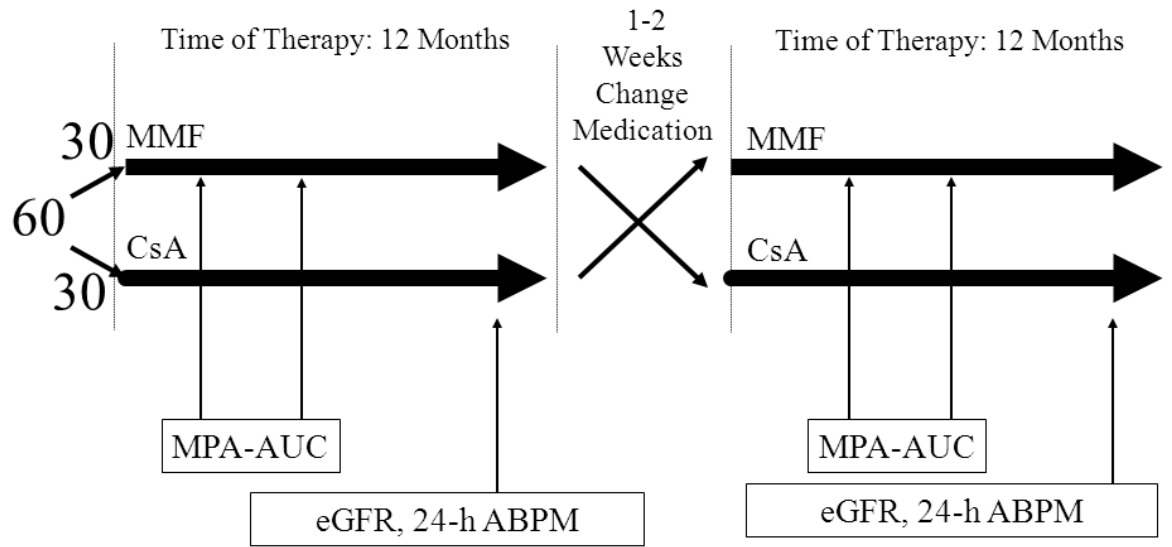

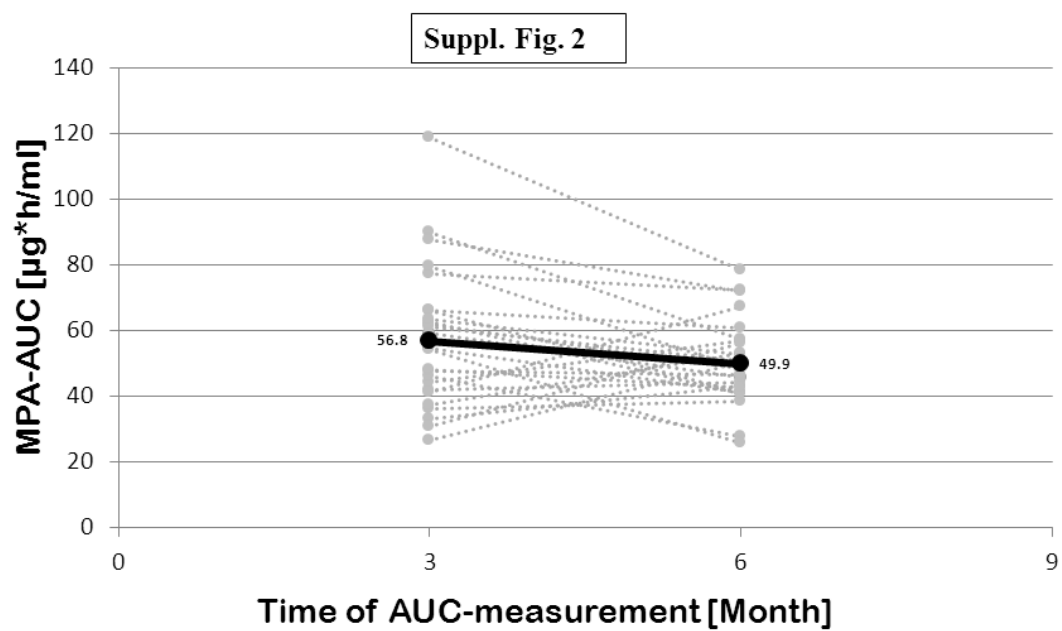

Suppl. Fig. 3A

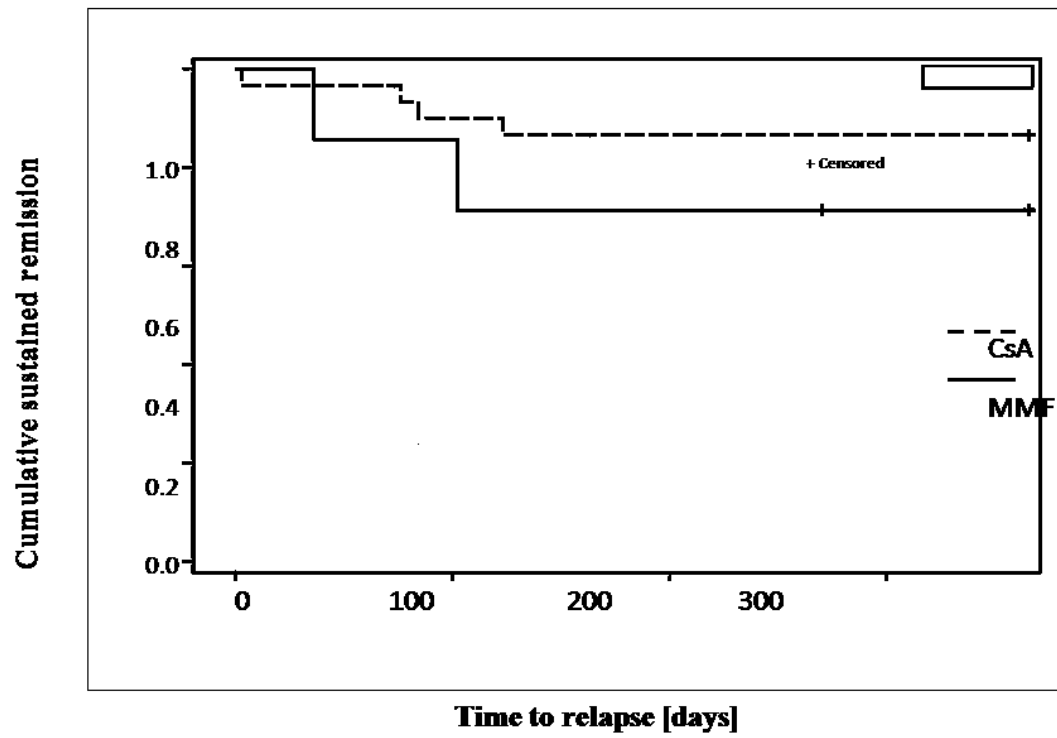

Suppl. Fig. 3B

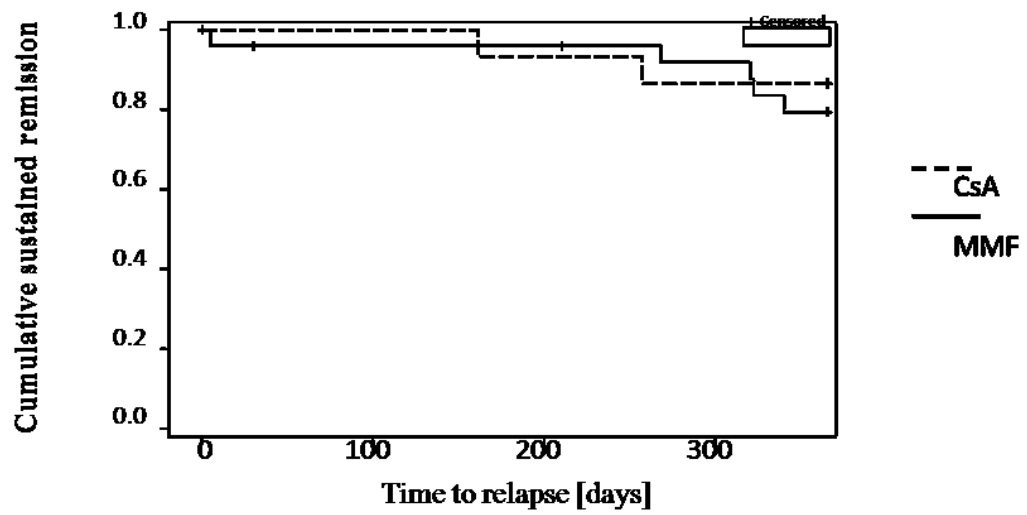

Suppl. Fig. 4

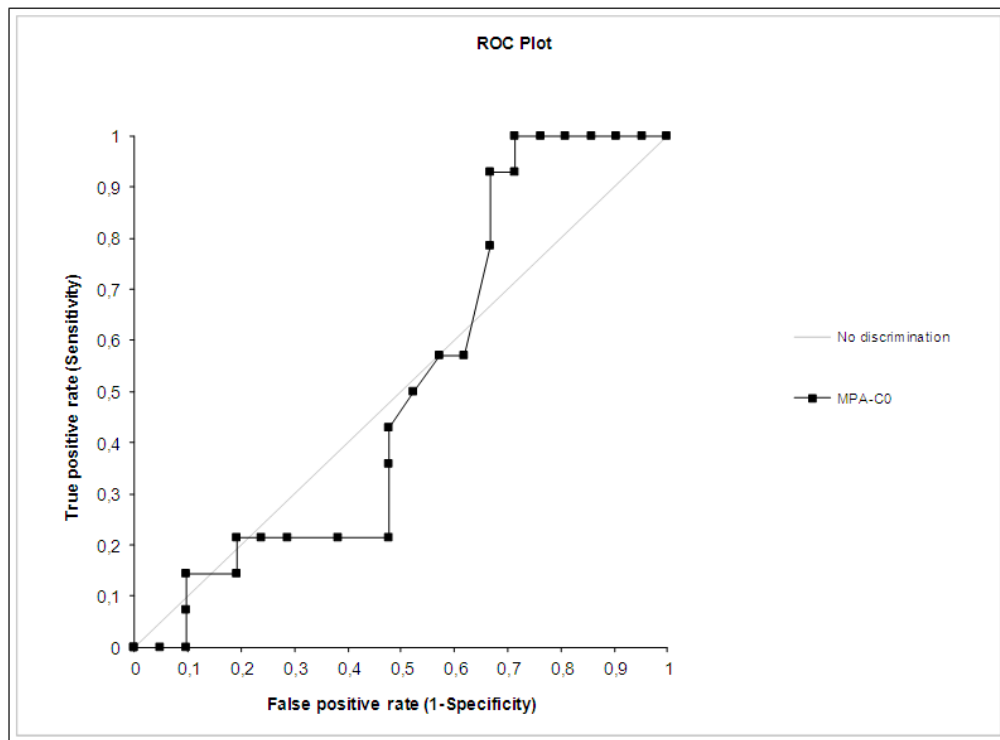

Suppl. Fig. 5

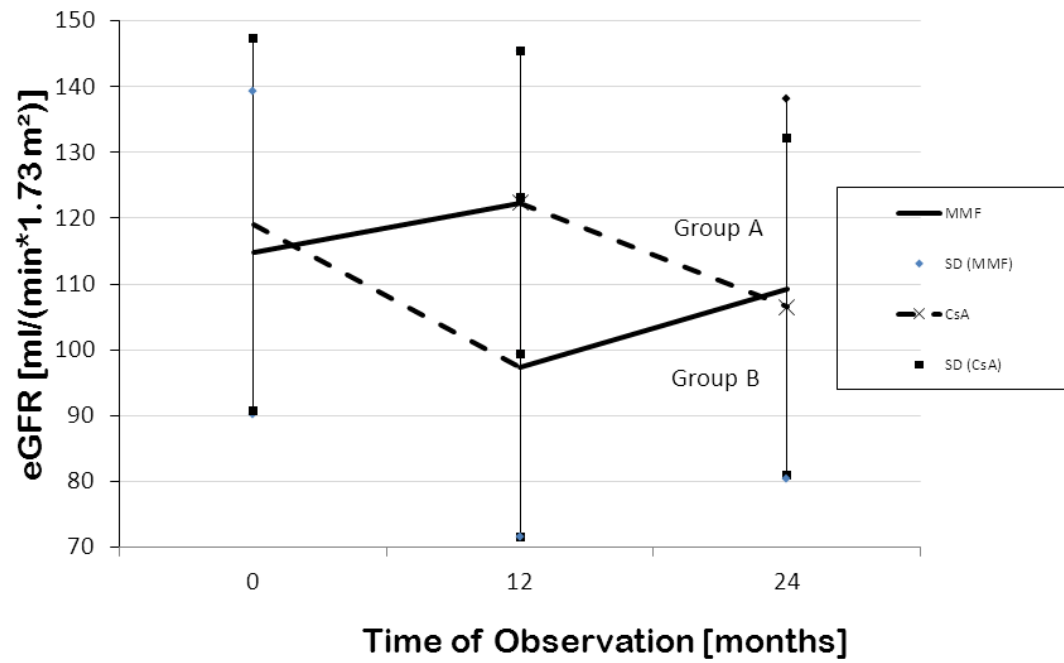

Supplement: ASN.2012121200_ASN2012121200SupplementaryData.pdf [file ASN.2012121200_ASN2012121200SupplementaryData.pdf]
